# Supplementary material
Source: PubMed Central journal article supplement (PMC9295564)
Supplement: jb.00114-22-s0001.pdf [file jb.00114-22-s0001.pdf]

**Table S1:** Proteins identified in the proteome analysis and their quantity

| <b>Protein</b> | <b>Name</b> | <b>Annotated function</b>                                   | <b>*Quantity</b> |
|----------------|-------------|-------------------------------------------------------------|------------------|
| PA2077         | OdsA        | oleate 10S-lipoxygenase                                     | 77.5             |
| PA0572         |             | hypothetical protein                                        | 49.01            |
| PA2078         | OdsB        | (7S,10S)-hydroperoxide diol synthase                        | 38.56            |
| PA1587         | Lpd         | dihydrolipoamide dehydrogenase                              | 24.69            |
| PA3190         |             | probable binding protein component of ABC sugar transporter | 22.98            |
| PA1074         | BraC        | branched-chain amino acid transport protein                 | 22.61            |
| PA2250         | Val         | lipoamide dehydrogenase                                     | 19.57            |
| PA1086         | FlgK        | flagellar hook-associated protein 1                         | 18.05            |
| PA0482         |             | malate synthase G                                           | 17.86            |
| PA3139         |             | probable amino acid aminotransferase                        | 12.54            |
| PA1787         | AcnB        | aconitate hydratase 2                                       | 10.07            |
| PA4163         |             | hypothetical protein                                        | 9.69             |
| PA1087         | FlgL        | flagellar hook-associated protein type 3                    | 8.74             |
| PA5153         |             | amino acid ABC transporter                                  | 7.98             |
| PA4761         | DnaK        | DnaK protein                                                | 7.98             |
| PA4366         | SodB        | superoxide dismutase                                        | 7.6              |
| PA5171         | ArcA        | arginine deiminase                                          | 7.22             |
| PA3655         | Tsf         | elongation factor Ts                                        | 6.65             |
| PA2951         | EtfA        | electron transfer flavoprotein alpha-subunit                | 6.27             |
| PA5435         |             | probable transcarboxylase subunit                           | 6.27             |
| PA1597         |             | hypothetical protein                                        | 5.89             |
| PA0423         | PasP        | protease                                                    | 5.7              |
| PA2709         | CysK        | cysteine synthase A                                         | 5.51             |
| PA2008         | FahA        | fumarylacetoacetase                                         | 5.51             |
| PA4498         | MdpA        | metallo-dipeptidase aeruginosa                              | 5.32             |
| PA5100         | HutU        | urocanase                                                   | 5.32             |
| PA1689         |             | conserved hypothetical protein                              | 5.13             |
| PA2952         | EtfB        | electron transfer flavoprotein beta-subunit                 | 5.13             |

---

\*Cut-off of  $\geq 5$  peptides identified
